# Supplementary material for: Exsolved medium-entropy alloy FeCoCuNi in titanate fibers enables solid oxide cells with superb electrochemical performance
Source: Royal Society of Chemistry journal article supplement (doi:10.1039/d4ta07207c), 2025-01-01
Supplement: d4ta07207c1.pdf [file d4ta07207c1.pdf]

## Supplementary Materials of

### **Exsolved medium-entropy alloy FeCoCuNi in titanate fibers enables solid oxide cells with superb electrochemical performance**

Zilin Zhou,<sup>a</sup> Jiajia Cui,<sup>a,b,\*</sup> Zhengrong Liu,<sup>a</sup> Jiaming Yang,<sup>a</sup> Yueyue Sun,<sup>a</sup>  
Chaofan Yin,<sup>a</sup> Zixuan Xue,<sup>a</sup> Jiaxi Niu,<sup>a</sup> Jingze Liu,<sup>a</sup> Kai Wu<sup>a,\*</sup> and Jun Zhou<sup>a,\*</sup>

<sup>a</sup> *Center of Nanomaterials for Renewable Energy, State Key Laboratory of Electrical Insulation and Power Equipment, Xi'an Jiaotong University, Xi'an 710049, People's Republic of China.*

<sup>b</sup> *School of Materials Science and Engineering, Xi'an University of Technology, Xi'an 710048, Shaanxi, People's Republic of China.*

#### **The PDF file includes:**

- Detailed preparation process of electrode
- Entropy calculation of multi-element alloy
- Faraday efficiency calculation
- Modeling of density functional theory calculation
- Reaction steps of co-electrolysis of CO<sub>2</sub> and H<sub>2</sub>O
- Fig.S1. Section images of solid oxide cell
- Fig.S2. XRD and SEM images of LST fiber
- Fig.S3. Refined XRD images of LSTFCCN fiber
- Fig.S4. X-ray Photoelectron Spectroscopy (XPS) analysis of LSTFCCN fiber
- Fig.S5. Current-Voltage curve of LSTX cell under SOFC mode
- Fig.S6. Maximum power density of LSTX cell under SOFC mode
- Fig.S7. Short-time stability of LSTX cell under SOFC mode

- Fig.S8. Current-Voltage curve of LSTX cell under SOEC mode
- Fig.S9. Models of absorption energy calculation
- Fig.S10. Models of CO<sub>2</sub>RR Gibbs free energy calculation
- Table.S1. Ratio of raw materials in LSTX fuel electrode preparation
- Table.S2. Lattice parameters of single-doped LSTX
- Table.S3. SOFC performance of single-doped LSTX electrode
- Table.S4. SOEC performance of single-doped LSTX cell
- Table.S5. Predicted adsorption energies for LST and LSTFCCN surfaces
- Table.S6. Specific Value of Atomic Bader Charge
- Table.S7. Comparison with SOEC/SOFC performance in other studies

## Detailed preparation process of electrode

①Electrospinning: A series of  $\text{La}_{0.4}\text{Sr}_{0.4}\text{Ti}_{0.9}\text{X}_{0.1}\text{O}_3$  (LSTX) nanofiber perovskite oxides with different concentrations of precursors PVP are prepared. Meanwhile, porous LSTX particles are prepared by sol-gel method for comparison, and the ratio is shown in Table.S1. According to the 0.004 mol target LSTX product, we weigh  $\text{La}(\text{NO}_3)_3 \cdot 6\text{H}_2\text{O}$ ,  $\text{Sr}(\text{NO}_3)_3 \cdot 6\text{H}_2\text{O}$ ,  $\text{Ni}(\text{NO}_3)_3 \cdot 6\text{H}_2\text{O}$ ,  $\text{Fe}(\text{NO}_3)_3 \cdot 6\text{H}_2\text{O}$ ,  $\text{Co}(\text{NO}_3)_3 \cdot 6\text{H}_2\text{O}$ ,  $\text{Cu}(\text{NO}_3)_2 \cdot 6\text{H}_2\text{O}$  and tetrabutyl titanate on the basis of stoichiometric ratio, and add them into appropriate amount of DMF solvent. A little acetic acid is also added to create a weak acid environment, and then an appropriate amount of PVP is added, and the mixed liquor is heated at 70 °C with magnetic stirring to obtain a transparent and viscous precursor solution. The electrospinning voltage is 15 kV, distance between needle and roller collector is 12 cm, and the injection speed is  $3\mu\text{l}\cdot\text{min}^{-1}$ .

②Synthesis of electrode materials: The obtained LSTX precursor fiber and the dry gel powder prepared by sol-gel method are transferred into a high-temperature box-type furnace. Firstly, the samples are heated to 400°C at the rate of  $1^\circ\text{C}\cdot\text{min}^{-1}$  and kept for an hour. Then the temperature is increased to 900 °C at a rate of  $5^\circ\text{C}\cdot\text{min}^{-1}$ , kept for 3 hours and then cooled down at a rate of  $5^\circ\text{C}\cdot\text{min}^{-1}$ .

③Preparation of cell: Firstly, appropriate amount of GDC powder is fully ball-milled with ethyl cellulose and terpineol solution for 24 hours to obtain GDC suspension. Secondly, the GDC suspension is evenly spun on the surface of SSZ electrolyte sheet. After spinning, SSZ electrolyte sheet is dried at 70 °C and then calcined at 1300 °C for 3 hours to obtain the electrolyte skeleton structure of “GDC|SSZ|GDC” initially. In the third step, terpineol and ethyl cellulose are fully mixed to make a viscous solution, while the electrode material powder and appropriate amount of solution are evenly ground to make a certain viscosity of the electrode material suspension. Through the screen pressing, the suspension is printed to the surface of the GDC layer and dried at 70°C, then being calcinated at 800 °C for 3 hours. Finally, we could obtain “electrode |GDC|SSZ|GDC|electrode” five-layer sandwich structured single cell.

## Entropy calculation of multi-element alloy

According to Fig.2E, the entropy of FCCN alloy can be calculated as follows:

$$\Delta S_{Fe} = -0.1499 \times \ln 0.1499 = 0.2844$$

$$\Delta S_{Co} = -0.1546 \times \ln 0.1546 = 0.2886$$

$$\Delta S_{Ni} = -0.2526 \times \ln 0.2526 = 0.3476$$

$$\Delta S_{Cu} = -0.4429 \times \ln 0.4429 = 0.3607$$

$$\Delta S = \Delta S_{Fe} + \Delta S_{Co} + \Delta S_{Ni} + \Delta S_{Cu} = 1.2813$$

Entropy of FCCN alloy is higher than 1 and lower than 1.5, which means it is Medium-Entropy-Alloy.

### Faraday efficiency calculation

Faraday efficiency is also calculated to characterize the electrolysis performance of LSTX cell, the equations are as follows:

$$FE_{CO} = \frac{\frac{v_{CO}}{1000 \cdot 22.4} \cdot 2 \cdot 96485}{I \cdot 60} = \frac{v_{CO}}{6.9648 \cdot I}$$

$$FE_{H_2} = \frac{\frac{v_{H_2}}{1000 \cdot 22.4} \cdot 2 \cdot 96485}{I \cdot 60} = \frac{v_{H_2}}{6.9648 \cdot I}$$

$$FE_{CH_4} = \frac{\frac{v_{CH_4}}{1000 \cdot 22.4} \cdot 8 \cdot 96485}{I \cdot 60} = \frac{v_{CH_4}}{1.7412 \cdot I}$$

$$S_{CH_4} = \frac{v_{CH_4}}{v_{CH_4} + v_{CO}}$$

$$T_{CO_2} = \frac{v_{CO} + v_{CH_4}}{v_{CO_2}}$$

Where:  $FE_{CO}$ : Faraday efficiency of CO

$v_{CO}$ : volume of CO gas generated on each unit area at fuel electrode/ $\text{ml} \cdot \text{min}^{-1} \cdot \text{cm}^{-2}$

$I$ : current density/ $\text{A} \cdot \text{cm}^{-2}$

$FE_{H_2}$ : Faraday efficiency of  $H_2$

$v_{H_2}$ : volume of  $H_2$  gas generated on each unit area at fuel electrode/ $\text{ml} \cdot \text{min}^{-1} \cdot \text{cm}^{-2}$

$FE_{CH_4}$ : Faraday efficiency of  $CH_4$

$v_{CH_4}$ : volume of  $CH_4$  gas generated on each unit area at fuel electrode/ $\text{ml} \cdot \text{min}^{-1} \cdot \text{cm}^{-2}$

$S_{CH_4}$ : selectance of  $CH_4$

$T_{CO_2}$ : conversion rate of CO<sub>2</sub>

### **Modeling of density functional theory calculation**

Firstly, the LST unit cell is modeled with a supercell model which contains 80 atoms (La<sub>8</sub>Sr<sub>8</sub>Ti<sub>16</sub>O<sub>48</sub>). Then the (110) surface slab is cleaved from the optimized supercell model of LST with O-terminations, and a 20 Å vacuum layer is attached to the upper surfaces of the slab. The FeCoCuNi atomic cluster is constructed on the upper surface of (110) surface slab to investigate the effects of FCCN alloys on the catalytic property on CO<sub>2</sub> reduction. Next, a CO<sub>2</sub> molecule with or without FeCoCuNi atomic cluster is adsorbed on the surface. In the case of LSTFCCN model, the CO<sub>2</sub> molecule is placed directly on the top of FCCN atomic cluster. For all structural optimizations, the atoms in the bottom layer of LST or LSTFCCN slab are fixed.

### **Reaction steps of electrolysis reaction of CO<sub>2</sub> and H<sub>2</sub>O**

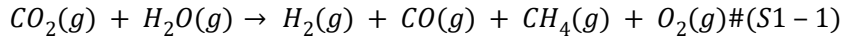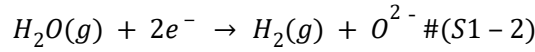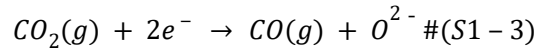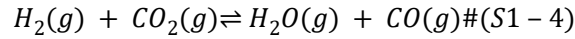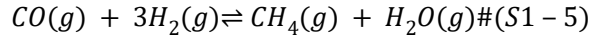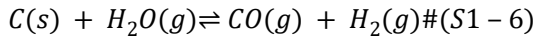

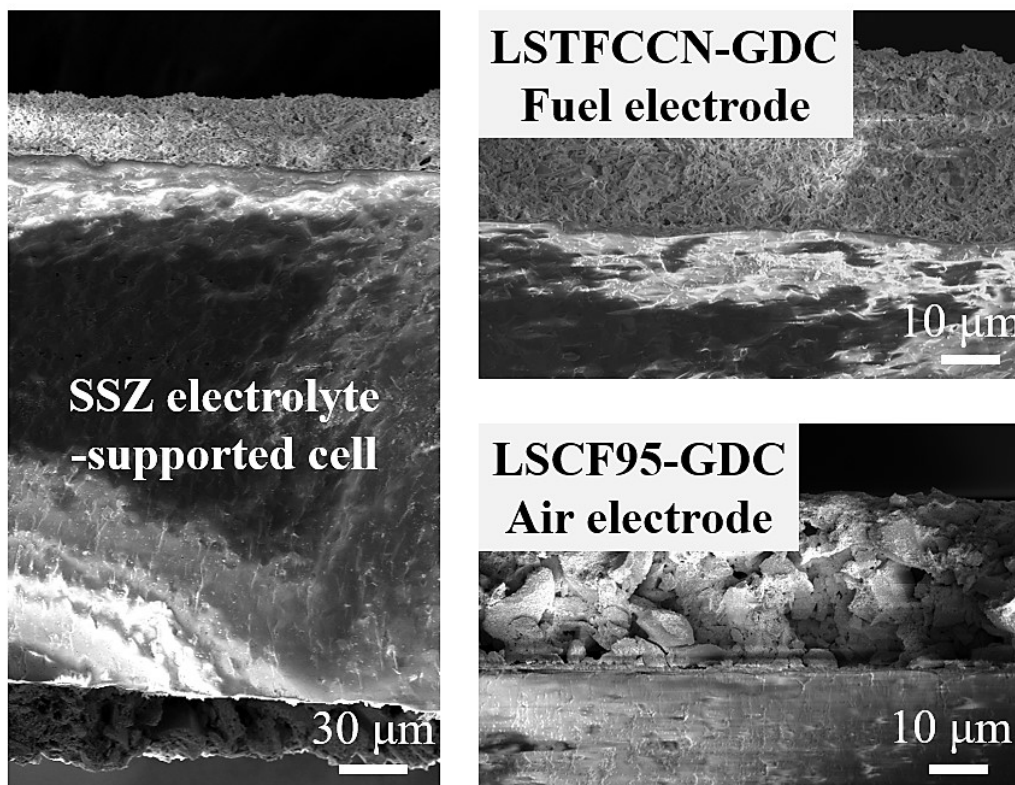

Fig.S1 SEM images of the cell's section.

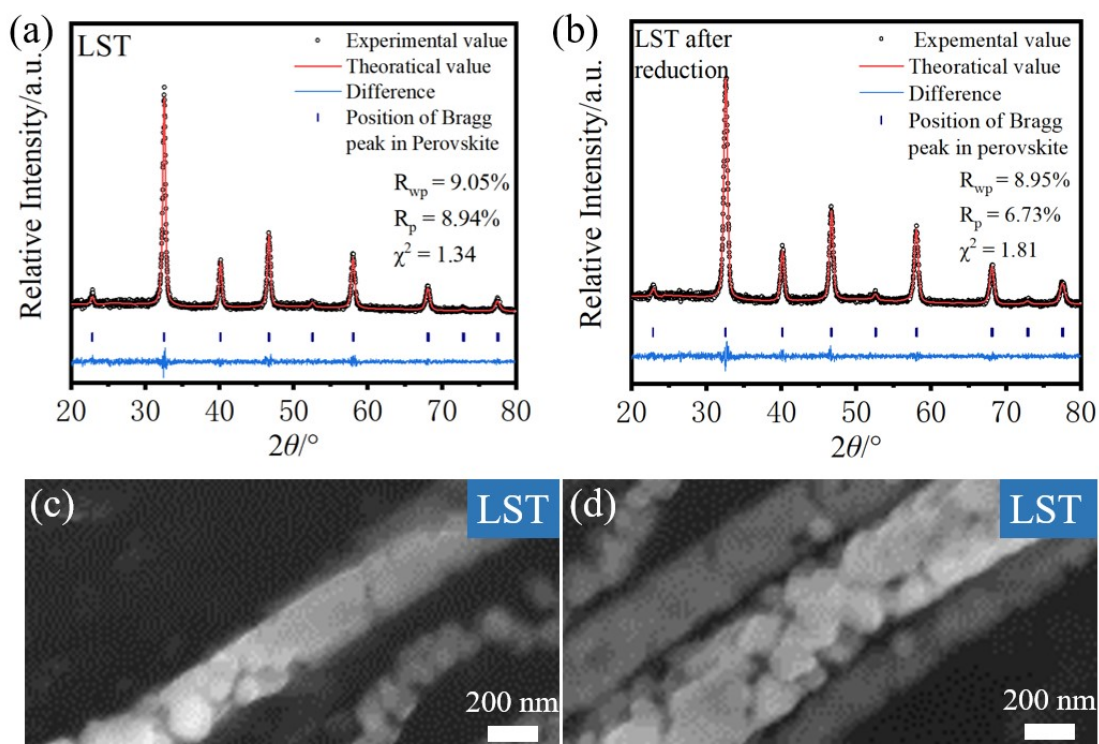

Fig.S2 (a)-(b) XRD analysis of LST fiber before and after reduction. (c)-(d) SEM images of LST fiber, the left one is the fiber before reduction, and the right one is the fiber after reduction.

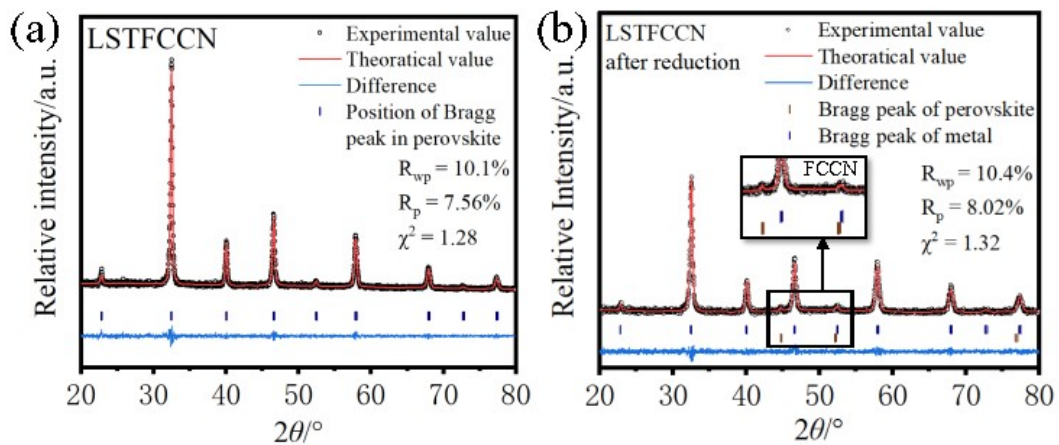

Fig.S3 (a)-(b) XRD analysis of LSTFCCN fiber before and after reduction.

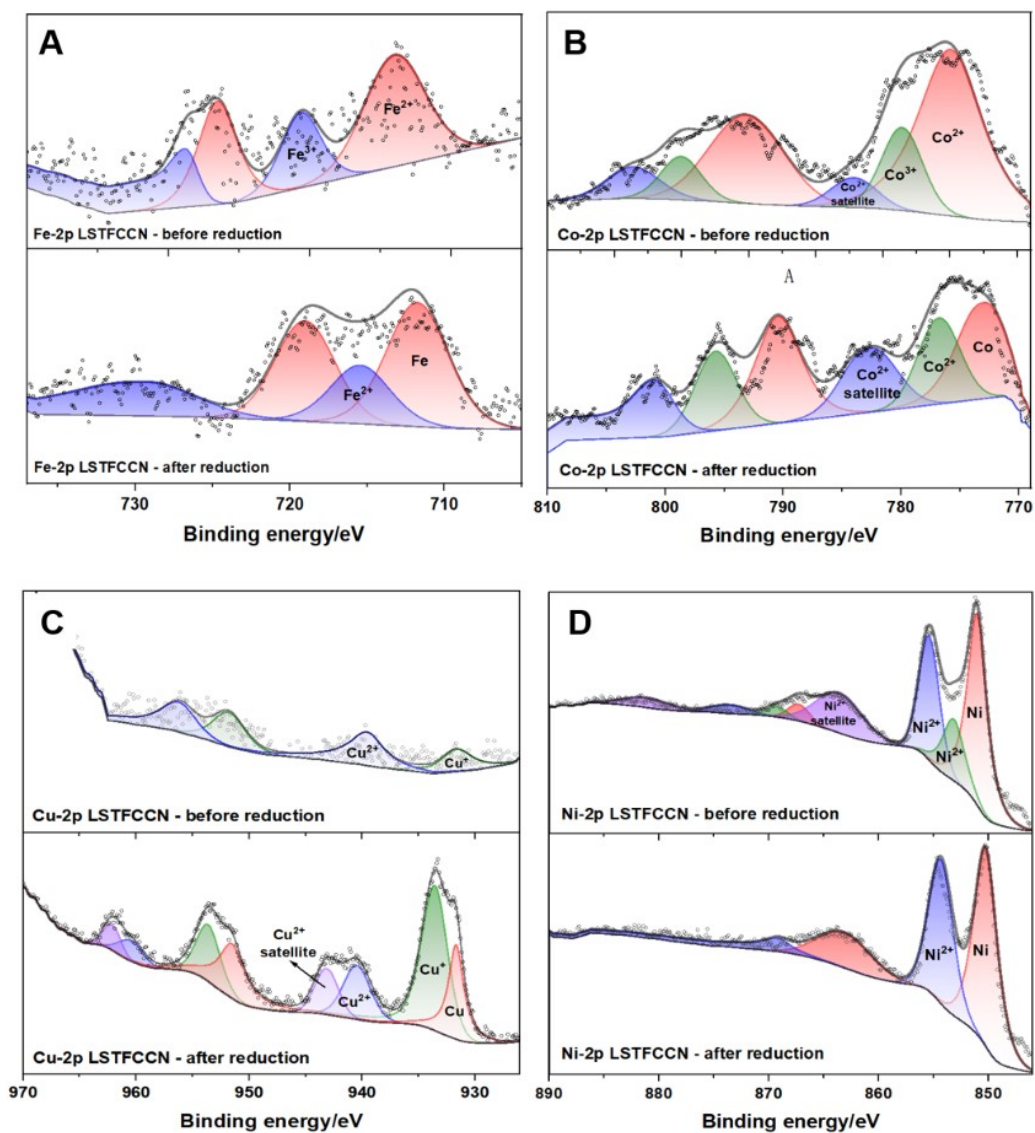

Fig.S4 X-ray Photoelectron Spectroscopy (XPS) analysis of LSTFCCN fiber

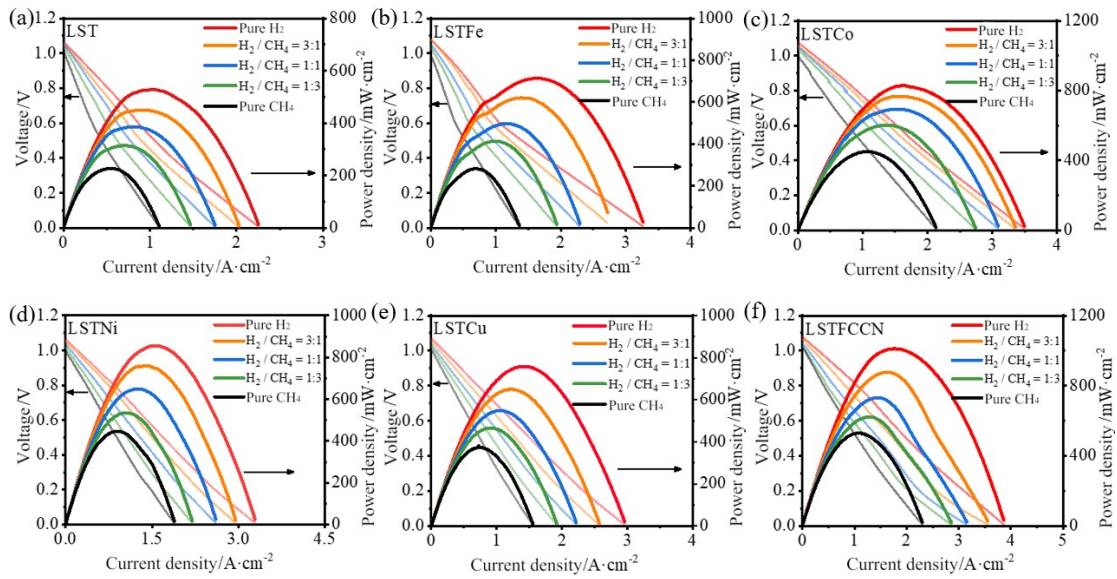

Fig.S5 Current-Voltage curve of LSTX cell under SOFC mode

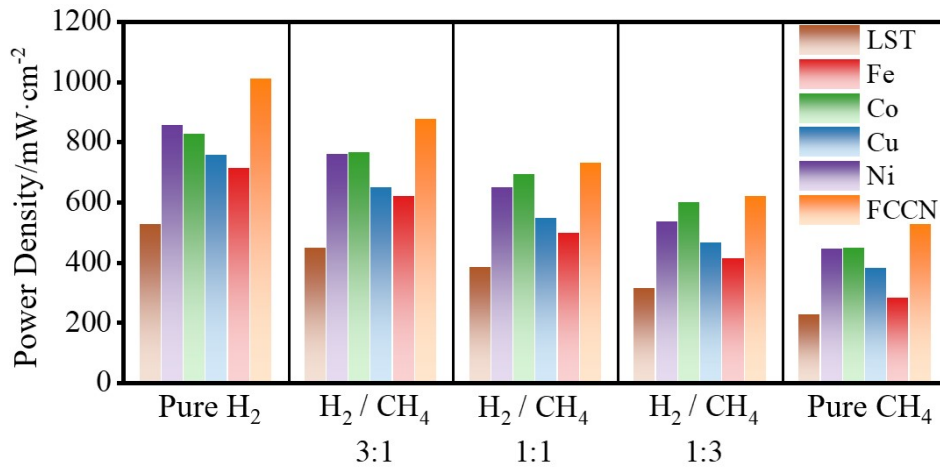

Fig.S6 Maximum power density of LSTX cell under SOFC mode

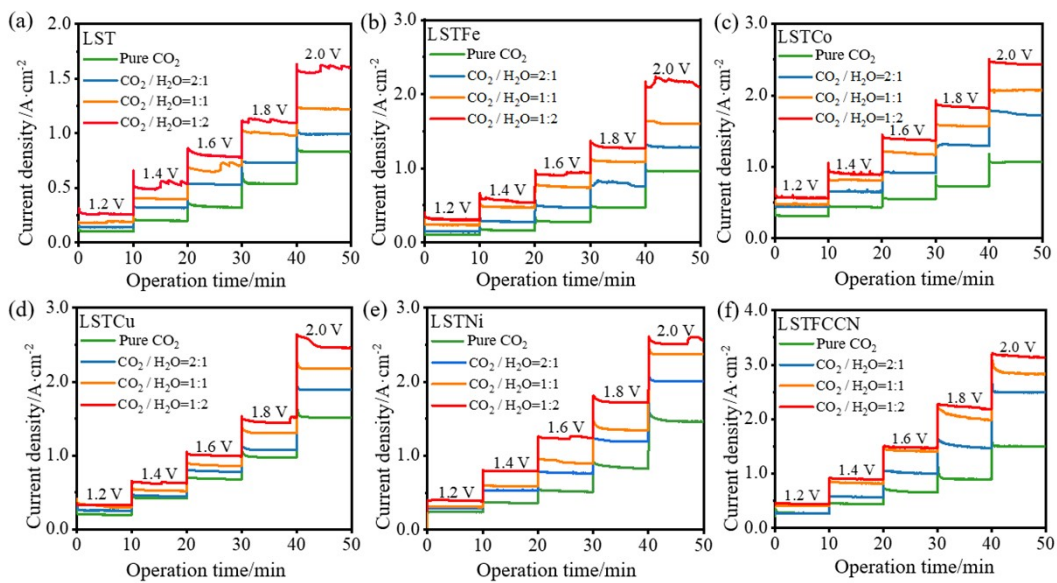

Fig.S7 Short-time stability of LSTX cell under SOFC mode



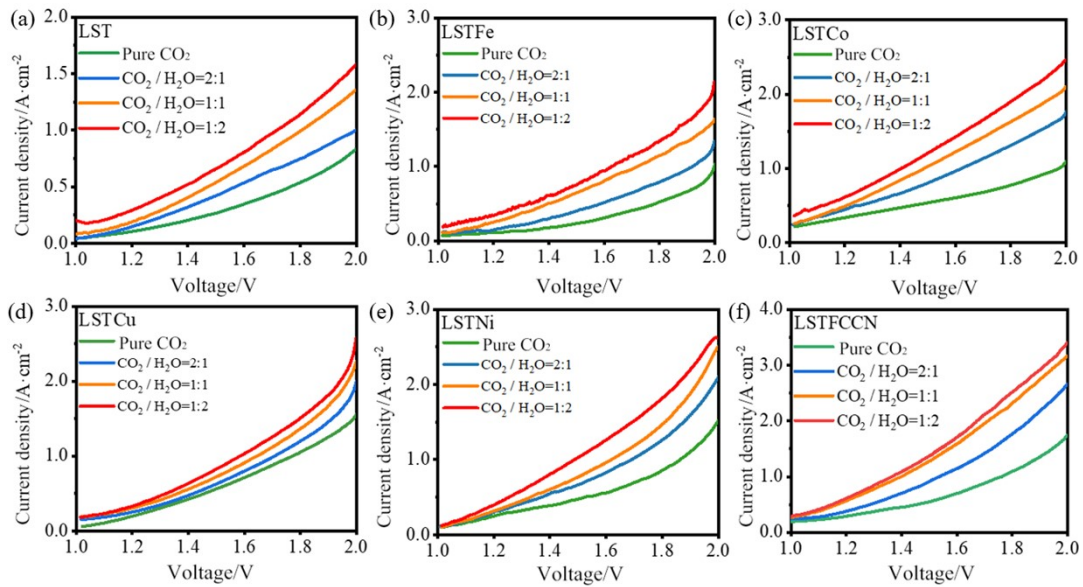

Fig.S8 Current-Voltage curve of LSTX cell under SOEC mode

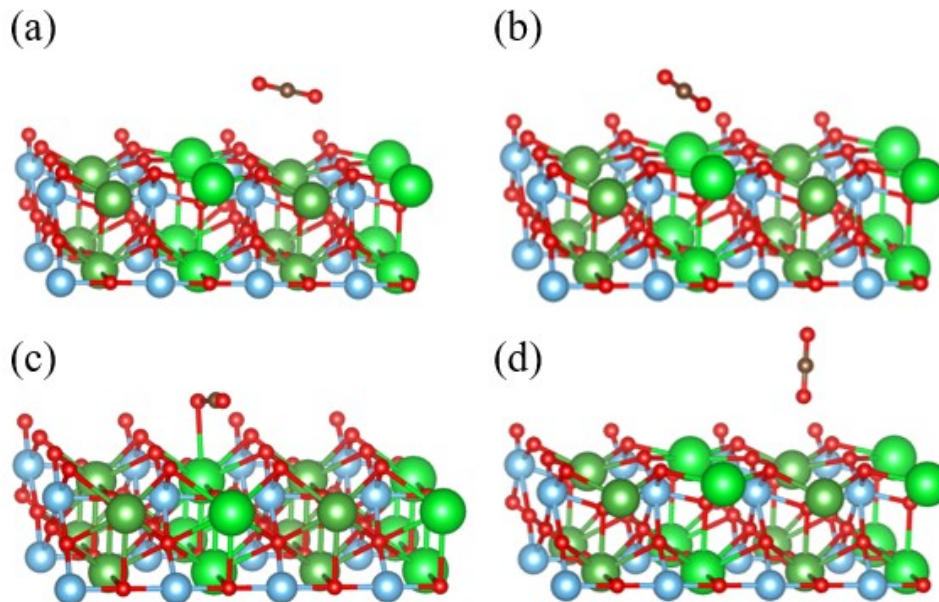

Fig.S9-1 Structures with different absorption sites after geometry optimization when only  $\text{CO}_2$  was absorbed on surface. As for the bulk, light green balls are La atoms, deep green balls are Sr atoms, light blue balls are Ti atoms, brown balls are C atoms, and red balls are O atoms.

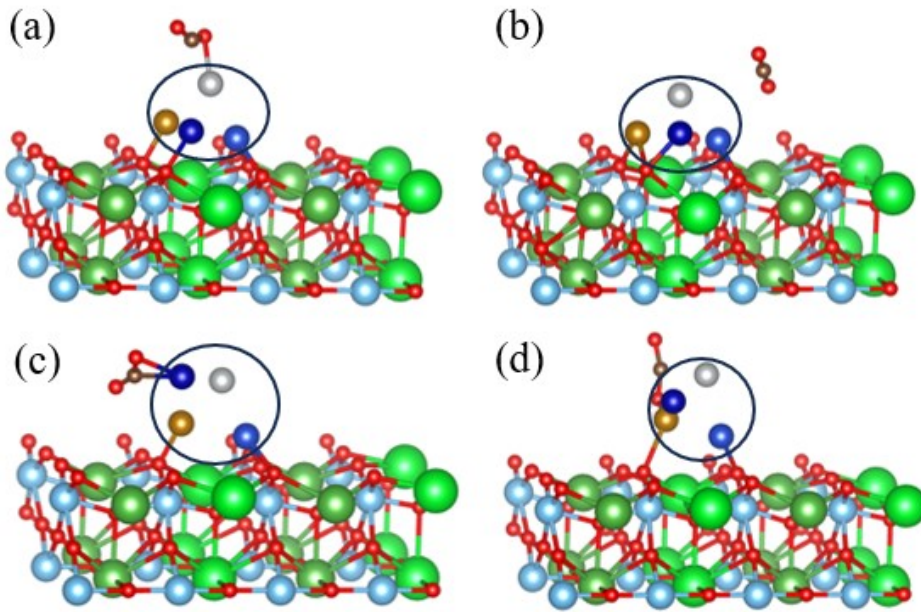

Fig.S9-2 Structures with different absorption sites after geometry optimization when cluster and CO<sub>2</sub> were co-absorbed on surface. As for the bulk, light green balls are La atoms, deep green balls are Sr atoms, light blue balls are Ti atoms, brown balls are C atoms, and red balls are O atoms.

The 4 circled atoms form FCCN cluster.

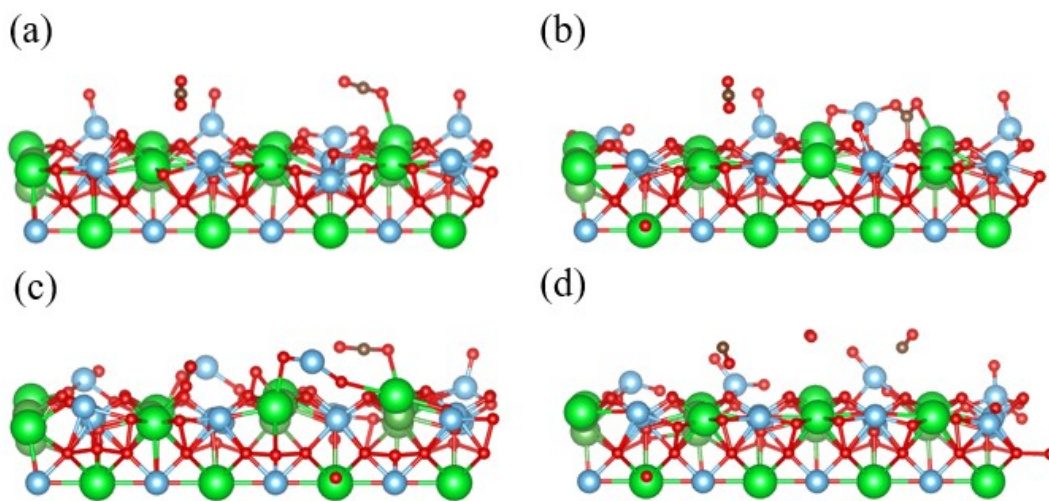

Fig.S10-1 Models of CO<sub>2</sub>RR energy calculation (only CO<sub>2</sub> absorbed). As for the bulk, light green balls are La atoms, deep green balls are Sr atoms, light blue balls are Ti atoms, brown balls are C atoms, and red balls are O atoms.

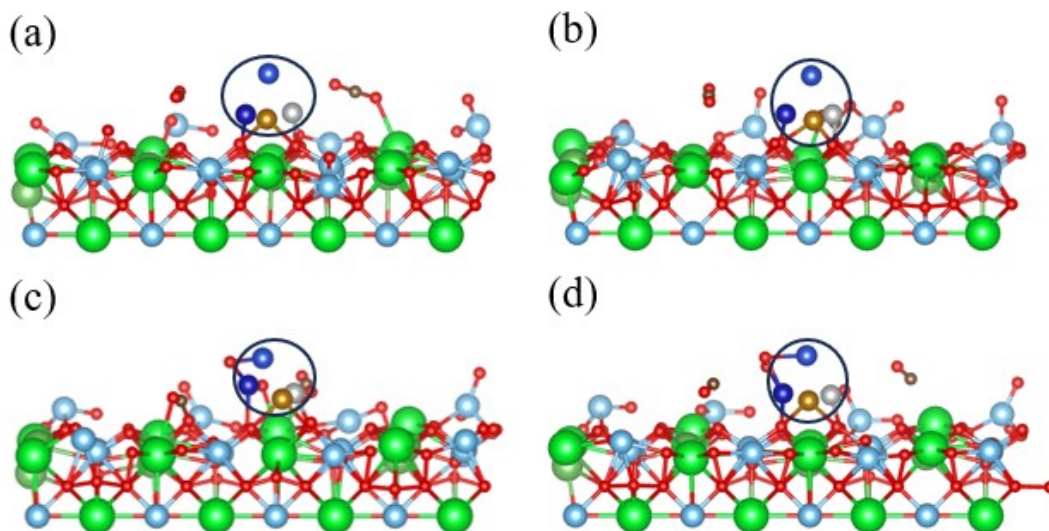

Fig.S10-2 Models of CO<sub>2</sub>RR energy calculation (CO<sub>2</sub> and FCCN cluster co-absorbed). As for the bulk, light green balls are La atoms, deep green balls are Sr atoms, light blue balls are Ti atoms, brown balls are C atoms, and red balls are O atoms. The 4 circled atoms form FCCN cluster.

Tabel.S1 Ratio of raw materials in LSTX fuel electrode preparation

| Fuel electrode                                           | Concentration of PVP              | Mass of PVP |
|----------------------------------------------------------|-----------------------------------|-------------|
| LSTX particles                                           | None (prepared by sol-gel method) |             |
| LSTX7                                                    | 7 wt%                             | 0.85 g      |
| LSTX10                                                   | 10 wt%                            | 1.26 g      |
| LSTX13                                                   | 13 wt%                            | 1.69 g      |
| LSTX16                                                   | 16 wt%                            | 2.16 g      |
| LSTX13-GDC complex fiber electrode<br>(mass ratio = 7:3) | 13 wt%                            | 1.69 g      |

Table.S2-1 Lattice parameters of LSTX fiber

| Material | $a/\text{\AA}$<br>( $a = b = c$ ) | Space group |
|----------|-----------------------------------|-------------|
| LST      | 3.89472                           | Pm-3m       |
| LSTFe    | 3.89804                           |             |
| LSTCo    | 3.90173                           |             |
| LSTCu    | 3.90250                           |             |
| LSTNi    | 3.89669                           |             |
| LSTFCCN  | 3.89925                           |             |

Table.S2-2 Lattice parameters of LSTX fiber after reduction

| Material | Content (mol ratio) | $a/\text{\AA}$ ( $a = b = c$ ) | Space group |
|----------|---------------------|--------------------------------|-------------|
| LST      | 100%                | 3.89598                        | Pm-3m       |
| LSTFe    | 96.88%              | 3.90127                        | Pm-3m       |
| Fe       | 3.12%               | 3.50817                        | Fm-3m       |
| LSTCo    | 96.75%              | 3.90752                        | Pm-3m       |
| Co       | 3.25%               | 3.53869                        | Fm-3m       |
| LSTCu    | 93.14%              | 3.89593                        | Pm-3m       |
| Cu       | 6.86%               | 3.61431                        | Fm-3m       |
| LSTNi    | 95.57%              | 3.89239                        | Pm-3m       |
| Ni       | 4.43%               | 3.49752                        | Fm-3m       |
| LSTFCCN  | 95.41%              | 3.90210                        | Pm-3m       |
| FeCoCuNi | 4.59%               | 3.55284                        | Fm-3m       |

Table.S3-1  $P_{Max}$  of LSTX cell under SOFC working mode

| LSTX cell | Electrochemical Properties | Fuel gas       |                                         |                                         |                                         |                 |
|-----------|----------------------------|----------------|-----------------------------------------|-----------------------------------------|-----------------------------------------|-----------------|
|           |                            | H <sub>2</sub> | H <sub>2</sub> / CH <sub>4</sub><br>3:1 | H <sub>2</sub> / CH <sub>4</sub><br>1:1 | H <sub>2</sub> / CH <sub>4</sub><br>1:3 | CH <sub>4</sub> |
| LST       | $P_{Max}/mW \cdot cm^{-2}$ | 528            | 450                                     | 386                                     | 314                                     | 228             |
| LSTFe     |                            | 714            | 621                                     | 497                                     | 414                                     | 282             |
| LSTCo     |                            | 828            | 765                                     | 693                                     | 601                                     | 449             |
| LSTCu     |                            | 758            | 649                                     | 548                                     | 466                                     | 382             |
| LSTNi     |                            | 856            | 759                                     | 650                                     | 535                                     | 447             |
| LSTFCCN   |                            | 1011           | 877                                     | 731                                     | 622                                     | 529             |

Table.S3-2  $R_p$  of LSTX cell under SOFC working mode

| LSTX cell | Electrochemical Properties | Fuel gas       |                                         |                                         |                                         |                 |
|-----------|----------------------------|----------------|-----------------------------------------|-----------------------------------------|-----------------------------------------|-----------------|
|           |                            | H <sub>2</sub> | H <sub>2</sub> / CH <sub>4</sub><br>3:1 | H <sub>2</sub> / CH <sub>4</sub><br>1:1 | H <sub>2</sub> / CH <sub>4</sub><br>1:3 | CH <sub>4</sub> |
| LST       | $R_p/\Omega \cdot cm^2$    | 0.302          | 0.377                                   | 0.457                                   | 0.536                                   | 0.780           |
| LSTFe     |                            | 0.206          | 0.265                                   | 0.330                                   | 0.416                                   | 0.551           |
| LSTCo     |                            | 0.128          | 0.173                                   | 0.219                                   | 0.316                                   | 0.425           |
| LSTCu     |                            | 0.187          | 0.237                                   | 0.294                                   | 0.367                                   | 0.438           |
| LSTNi     |                            | 0.143          | 0.176                                   | 0.211                                   | 0.286                                   | 0.383           |
| LSTFCCN   |                            | 0.111          | 0.161                                   | 0.192                                   | 0.226                                   | 0.311           |

Table.S4-1 Electrochemical performance of LSTX cell under SOEC working mode

| LSTX cell | Fuel gas        | Current density<br>under 1.3V/A·cm <sup>-2</sup> | Polarization resistance under different voltage/ $\Omega \cdot cm^2$ |       |       |       |       |
|-----------|-----------------|--------------------------------------------------|----------------------------------------------------------------------|-------|-------|-------|-------|
|           |                 |                                                  | 1.1 V                                                                | 1.2V  | 1.3V  | 1.4V  | 1.5V  |
| LSTFe     | CO <sub>2</sub> | 0.149                                            | 1.606                                                                | 1.181 | 0.915 | 0.712 | 0.631 |
|           | 2:1             | 0.228                                            | 1.356                                                                | 0.982 | 0.789 | 0.579 | 0.486 |
|           | 1:1             | 0.375                                            | 1.147                                                                | 0.849 | 0.642 | 0.509 | 0.411 |
|           | 1:2             | 0.478                                            | 0.839                                                                | 0.694 | 0.429 | 0.370 | 0.325 |
| LSTCo     | CO <sub>2</sub> | 0.374                                            | 0.753                                                                | 0.583 | 0.472 | 0.371 | 0.291 |
|           | 2:1             | 0.525                                            | 0.583                                                                | 0.405 | 0.285 | 0.258 | 0.220 |
|           | 1:1             | 0.662                                            | 0.540                                                                | 0.357 | 0.263 | 0.208 | 0.181 |
|           | 1:2             | 0.794                                            | 0.359                                                                | 0.287 | 0.216 | 0.180 | 0.163 |
| LSTCu     | CO <sub>2</sub> | 0.300                                            | 1.004                                                                | 0.711 | 0.585 | 0.472 | 0.366 |

|       |                 |       |       |       |       |       |       |
|-------|-----------------|-------|-------|-------|-------|-------|-------|
|       | 2:1             | 0.306 | 0.928 | 0.670 | 0.529 | 0.439 | 0.357 |
|       | 1:1             | 0.316 | 0.910 | 0.632 | 0.496 | 0.401 | 0.351 |
|       | 1:2             | 0.370 | 0.866 | 0.609 | 0.459 | 0.384 | 0.330 |
| LSTNi | CO <sub>2</sub> | 0.324 | 0.783 | 0.626 | 0.468 | 0.367 | 0.314 |
|       | 2:1             | 0.416 | 0.607 | 0.491 | 0.402 | 0.335 | 0.303 |
|       | 1:1             | 0.454 | 0.522 | 0.390 | 0.342 | 0.300 | 0.270 |
|       | 1:2             | 0.591 | 0.467 | 0.358 | 0.301 | 0.268 | 0.229 |

Table.S5 Predicted adsorption energies for LST and LSTFCCN surfaces

| System                                            | $E_{abs}/eV$ |
|---------------------------------------------------|--------------|
| <i>LaSrTi<sub>2</sub>O<sub>6</sub></i>            | -0.3099      |
| <i>LaSrTi<sub>2</sub>O<sub>6</sub> + FeCoNiCu</i> | -1.4808      |

Table.S6 Specific Value of Atomic Bader Charge

| Atom | Charge          |             |
|------|-----------------|-------------|
|      | Single adsorbed | Co-adsorbed |
| C    | 0.000000        | 0.000001    |
| O1   | 8.324242        | 8.017715    |
| O2   | 8.004517        | 7.995289    |
| Fe   |                 | 15.447237   |
| Co   |                 | 16.587404   |
| Ni   |                 | 17.843711   |
| Cu   |                 | 10.575723   |

Table.S7 Comparison of performance with others' researches

| Material                                  | Power Density/W · cm <sup>-2</sup> | Current Density/A · cm <sup>-2</sup> | Experimental Conditions |
|-------------------------------------------|------------------------------------|--------------------------------------|-------------------------|
| <b>LSTFCCN</b>                            | <b>1.01</b>                        | <b>0.85</b>                          |                         |
| SBF <sup>S1</sup>                         | 0.84                               | 1.01                                 |                         |
| PBC-BCW <sup>RS2</sup>                    | 0.75                               | 0.84                                 |                         |
| NBCCF <sup>S3</sup>                       | 0.94                               | 0.92                                 | SOFC mode: 800 °C       |
| (La/Sr)(Ti/Fe)O <sup>S</sup> <sub>4</sub> | 0.70                               | 0.52                                 | SOEC mode: 1.3 V        |
| PS30C <sup>S5</sup>                       | 0.83                               | 1.19                                 |                         |
| PBNF0.1 <sup>S6</sup>                     | 0.65                               | 0.90                                 |                         |

## References:

**S1** Zhang M, Du Z, Sun Z, et al. Unraveling the promotional role of BaCO<sub>3</sub> in the electrode reaction kinetics of an SmBaFe<sub>2</sub>O<sub>5+δ</sub> air electrode of reversible solid oxide cells[J]. Journal of Materials Chemistry A, 2023, 11(40): 21645-21654.

**S2** Zhang M, Liu J, Du Z, et al. Highly active and stable oxygen electrode PrBaCo<sub>2</sub>O<sub>5+δ</sub>-Ba<sub>2</sub>CoWO<sub>6</sub> enabled by In Situ formed misfit dislocation interface for reversible solid oxide cell[J]. Applied Catalysis B: Environment and Energy, 2025, 361: 124669.

**S3** Tian Y, Liu Y, Wang W, et al. High performance and stability of double perovskite-type oxide NdBa<sub>0.5</sub>Ca<sub>0.5</sub>Co<sub>1.5</sub>Fe<sub>0.5</sub>O<sub>5+δ</sub> as an oxygen electrode for reversible solid oxide electrochemical cell[J]. Journal of Energy Chemistry, 2020, 43: 108-115.

**S4** Zhang L, Li Y, Zhang B, et al. (La, Sr) (Ti, Fe) O<sub>3-δ</sub> perovskite with in-situ constructed FeNi<sub>3</sub> nanoparticles as fuel electrode for reversible solid oxide cell[J]. International Journal of Energy Research, 2021, 45(15): 21264-21273.

**S5** Hu H, Wang C, Ni J, et al. Sr-Doped PrCrO<sub>3</sub> with Intelligent SrCrO<sub>x</sub> Cocatalyst for the Fuel Electrode of Reversible Solid Oxide Cells[J]. ACS Sustainable Chemistry & Engineering, 2024, 12(10): 4051-4060.

**S6** Li Z, Yang B, Qian B, et al. Evaluation of Fe-doped Pr<sub>1.8</sub>Ba<sub>0.2</sub>NiO<sub>4</sub> as a high-performance air electrode for reversible solid oxide cell[J]. Separation and Purification Technology, 2023, 308: 123002.
